# Supplementary material for: The cryo-EM structure of the bd oxidase from M. tuberculosis reveals a unique structural framework and enables rational drug design to combat TB
Source: Springer Nature journal article supplement (doi:10.1038/s41467-021-25537-z), 2021-09-02
Supplement: MOESM1 [file 41467_2021_25537_MOESM1_ESM.pdf]

16 **Supplementary Table 1 - Cryo-EM data collection and validation.** Cryo-EM data statistics of oxidized  
 17 cytochrome *bd* oxidase from *M. tuberculosis*.

|                                                  | <i>as isolated</i>             | Aurachin D      | AD3-11          |
|--------------------------------------------------|--------------------------------|-----------------|-----------------|
| <b>Data collection</b>                           |                                |                 |                 |
| Accession number                                 | EMD-12451                      | EMD-12533       | EMD-12532       |
| Magnification                                    | 105k                           | 105k            | 105k            |
| Voltage / kV                                     | 300                            | 300             | 300             |
| Dose / e <sup>-</sup> Å <sup>-2</sup>            | 108                            | 108             | 108             |
| Pixel size / Å                                   | 0.837                          | 0.837           | 0.837           |
| Focus range / μm                                 | -1.1. to -2.1                  | -1.1. to -2.1   | -1.1. to -2.1   |
| Recorded movies                                  | 12070                          | 7401            | 8514            |
| Final particle images                            | 843799                         | 194987          | 437753          |
| Camera                                           | Gatan K3                       | Gatan K3        | Gatan K3        |
| Microscope                                       | Titan Krios G3i                | Titan Krios G3i | Titan Krios G3i |
| <b>Image processing</b>                          |                                |                 |                 |
| Initial model                                    | <i>de novo</i>                 | EMD-12451       | EMD-12451       |
| Resolution (FSC <sub>0.143</sub> ) / Å           | 2.5                            | 3.3             | 2.8             |
| Applied B-factor / Å <sup>2</sup>                | -70                            | -100            | -80             |
| <b>Model refinement</b>                          |                                |                 |                 |
| PDB accession                                    | 7NKZ                           |                 |                 |
| Validation                                       |                                |                 |                 |
| FSC <sup>map-to-model</sup> <sub>(0.5)</sub> / Å | 2.6                            |                 |                 |
| MolProbity score                                 | 1.58                           |                 |                 |
| Composition                                      |                                |                 |                 |
| Atoms                                            | 6424                           |                 |                 |
| Protein residues                                 | 792                            |                 |                 |
| Waters                                           | 42                             |                 |                 |
| Ligands                                          | 2 HEB, 1 HDD, 1 MK-9,<br>1 OXY |                 |                 |
| Bonds (R.M.S.D.)                                 |                                |                 |                 |
| Length (Å)                                       | 0.004                          |                 |                 |
| Angles (°)                                       | 1.07                           |                 |                 |
| B-factors (min/max/mean)                         |                                |                 |                 |
| Protein                                          | 29.4/88.68/50.67               |                 |                 |
| Ligand                                           | 33.33/45.54/39.28              |                 |                 |
| Waters                                           | 33.22/70.97/45.11              |                 |                 |
| Clashscore                                       | 11.51                          |                 |                 |
| Ramachandran plot (%)                            |                                |                 |                 |
| Favored                                          | 98.85                          |                 |                 |
| Allowed                                          | 1.15                           |                 |                 |
| Outliers                                         | 0                              |                 |                 |
| Rotamer outliers (%)                             | 0.63                           |                 |                 |

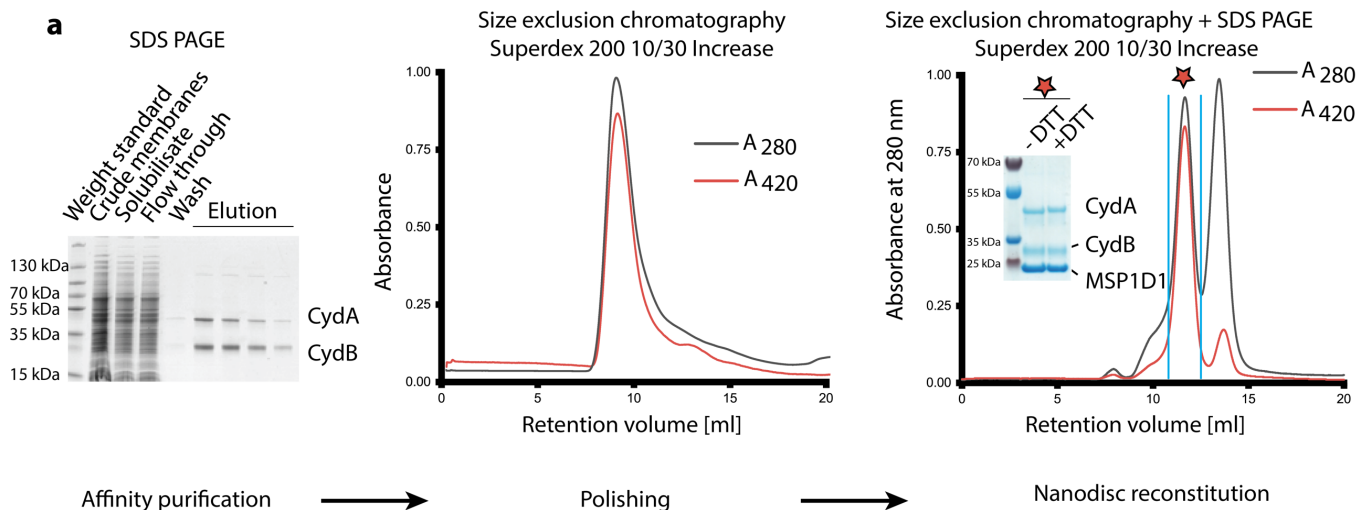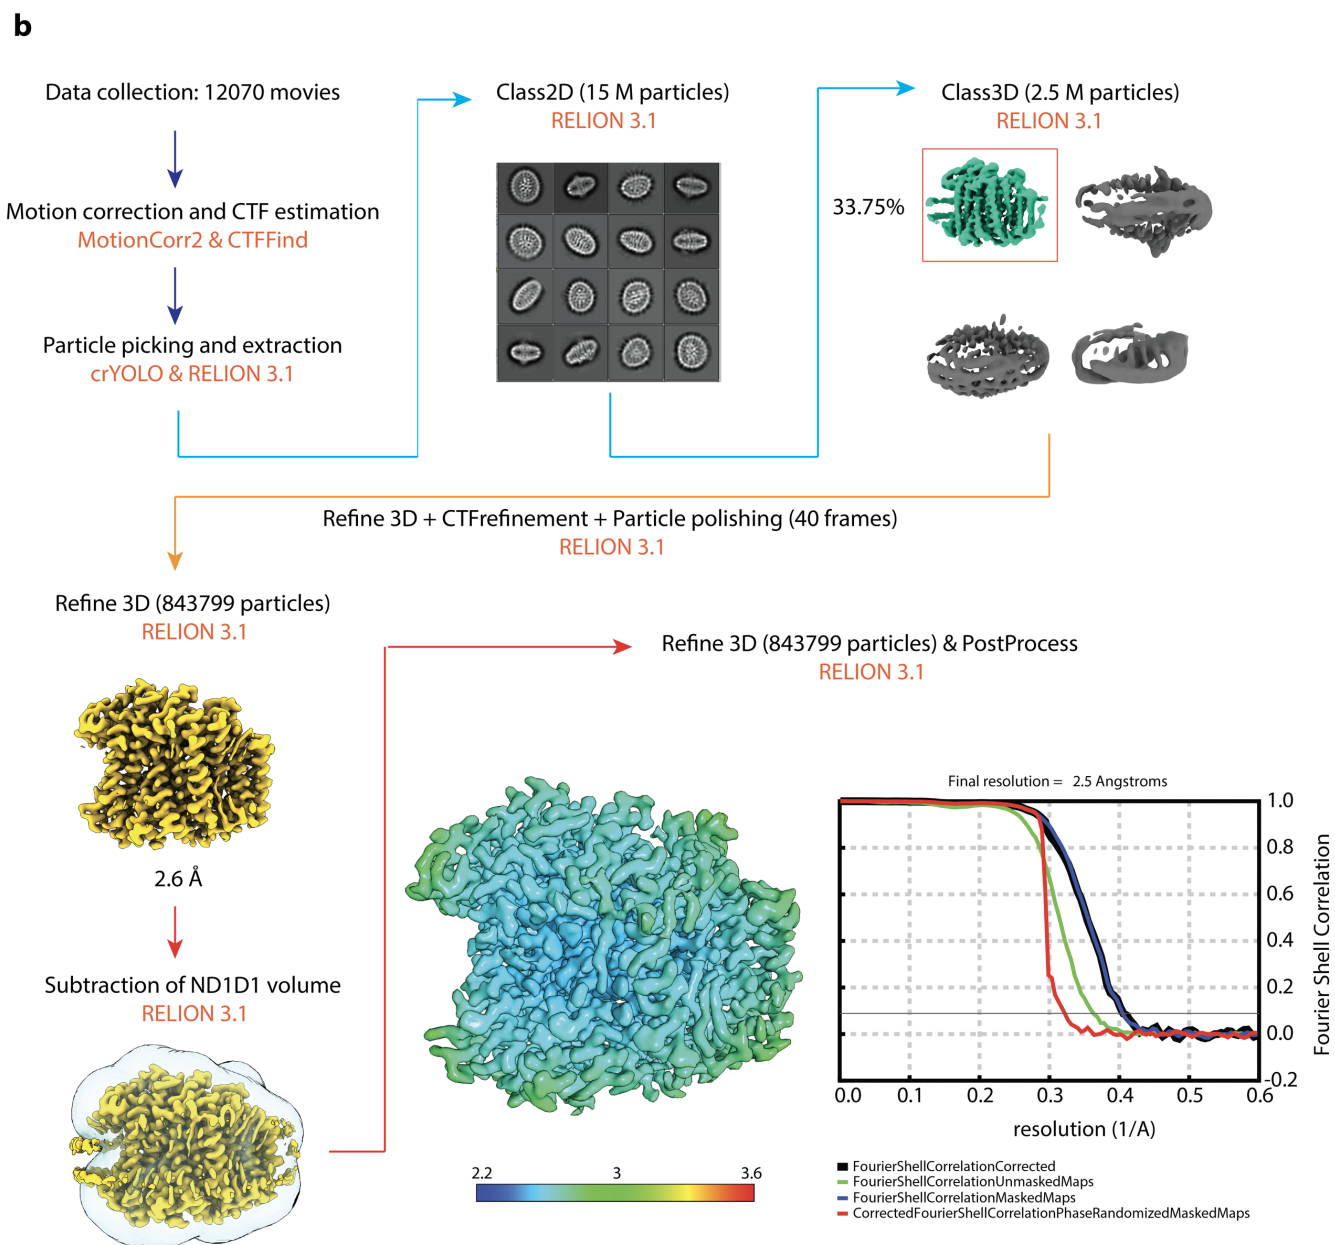

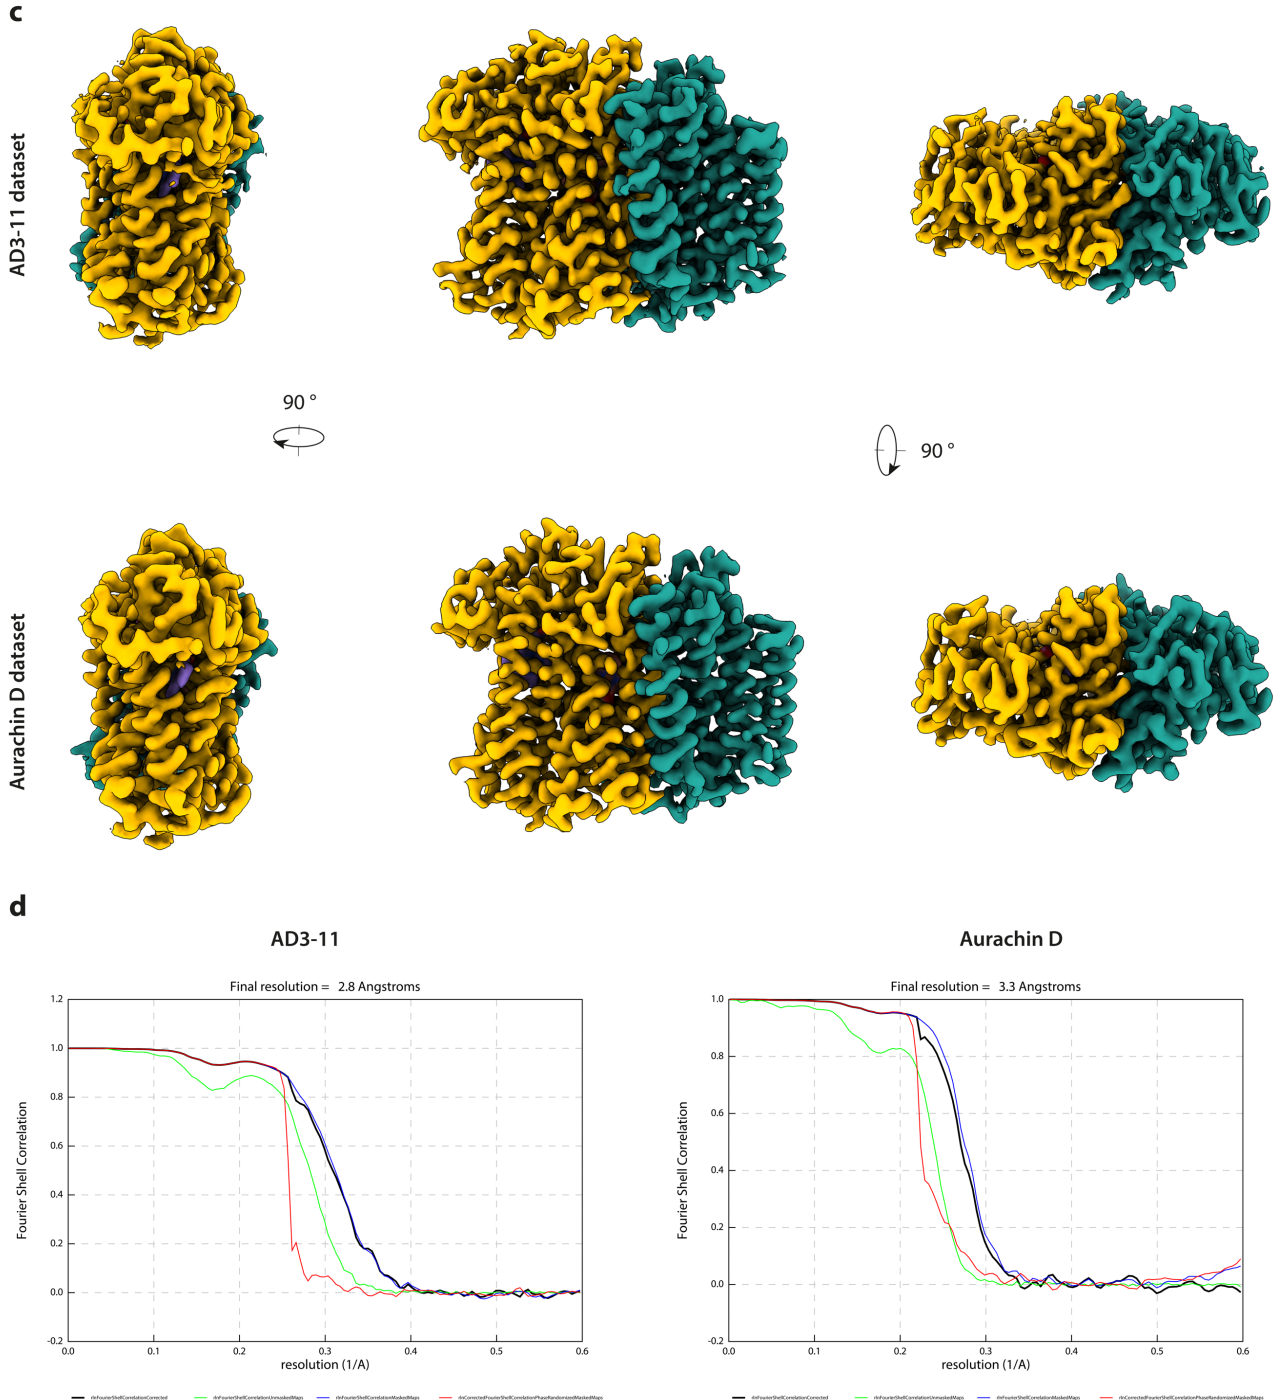

19

20 **Supplementary Fig. 1 - Sample preparation and image processing.** (a) The cytochrome *bd* oxidase was  
 21 produced in *Mycobacterium smegmatis* mc<sup>2</sup>155  $\Delta$ *cydAB* cells and purified by FLAG-tag affinity  
 22 chromatography followed by SEC. The purified complex was reconstituted into lipid nanodiscs (1D1)  
 23 and separated from empty nanodiscs by SEC. Peak fractions were collected and analyzed by SDS-PAGE  
 24 (oxidized and reduced form) and used for downstream cryo-EM specimen preparation (b) All datasets  
 25 (*as isolated*, Aurachin D, AD3-11) were processed according to the following scheme, which is shown  
 26 for the *as isolated* dataset as an example. Statistical values for all three datasets are summarized in  
 27 Supplementary Table 1. Initial full-frame motion correction was performed with MotionCorr2 (RELION-

28 3.1). CTF estimation was performed using CTFFind4 (version 4.1). A number of 15M Particles were  
29 picked using crYOLO and subsequently extracted in the RELION-3.1 suite. A total of 2.5 M particle  
30 images from 2D classes indicating distinct features were selected for further processing. A subset of  
31 these particles was used for initial model generation. Three-dimensional classification showed a single  
32 class exhibiting map features of a transmembrane protein. Particle images from class 1 were used for  
33 a consensus 3D refinement to an average resolution of  $FSC_{0.143} = 2.9 \text{ \AA}$ . To further improve the  
34 resolution, CTF refinement, particle polishing, and nanodisc subtraction were performed. A final  
35 refinement step using fine angular sampling steps and a tight soft-edged 3D mask converged to a  
36 resolution of  $FSC_{0.143} = 2.5 \text{ \AA}$ . The final reconstruction indicates differences in local resolution, with  
37 higher resolution in the center and slightly lower resolution at the periphery of the complex. (c)  
38 Unsharpened cryo-EM maps of *bd* oxidase structures in presence of inhibitors Aurachin D and AD3-11.  
39 (d) Fourier shell correlation plots of inhibitor datasets.

40

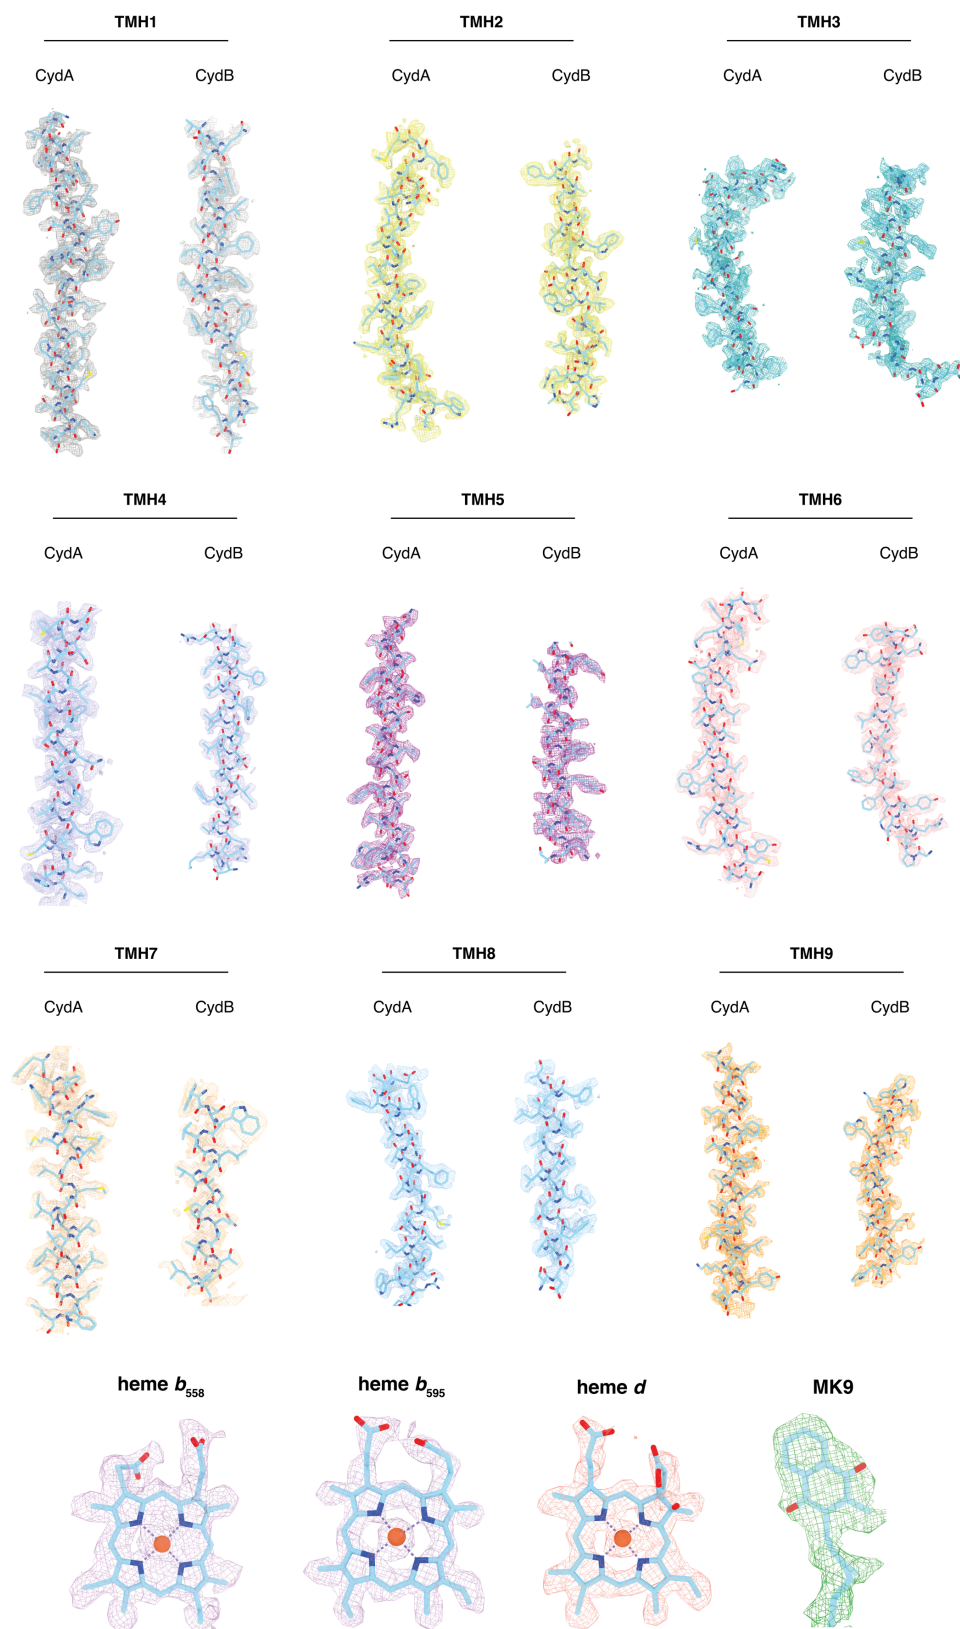

41 **Supplementary Fig. 2 – Density features at 2.5 Å resolution.** Visual inspection of density features of  
 42 transmembrane helices and cofactors (heme  $b_{558}$ , heme  $b_{595}$ , heme  $d$ , and MK-9). Symmetry related  
 43 transmembrane helices are presented in a matching color code. Helix topologies are maintained  
 44 according to the *bd* oxidase fold. Presented densities are sharpened by a b-factor of -70.  
 45

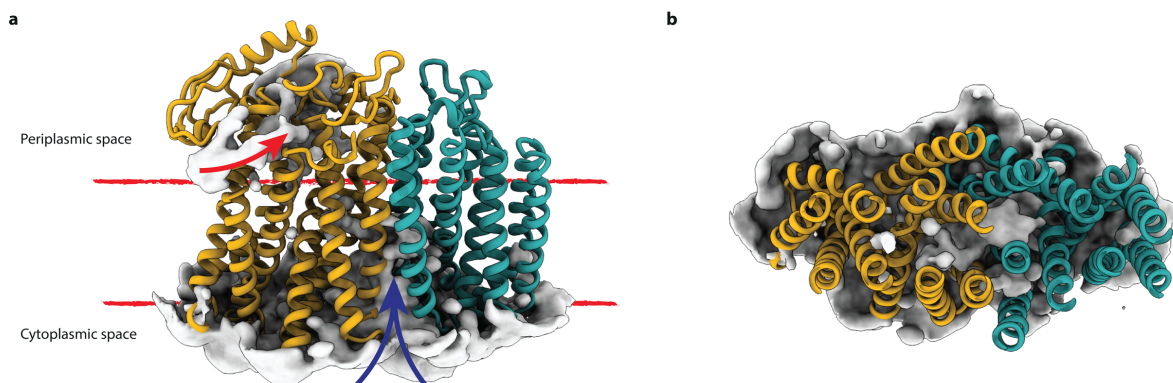

46  
 47 **Supplementary Fig. 3 – Averaged protein hydration map obtained from molecular dynamics**  
 48 **simulations.** (a) Solvent accessibility from the cytoplasmic and periplasmic space. Entry sites of the  
 49 substrate proton channel and the solvent accessible region near heme  $b_{558}$  are indicated by red and  
 50 blue arrows, respectively. (b) Periplasmic view on the mycobacterial *bd* oxidase showing the pathway  
 51 of solvent molecules towards the enzyme reaction center at the interface between CydA and CydB.  
 52 CydA, yellow; CydB, green; solvent map, grey.

a

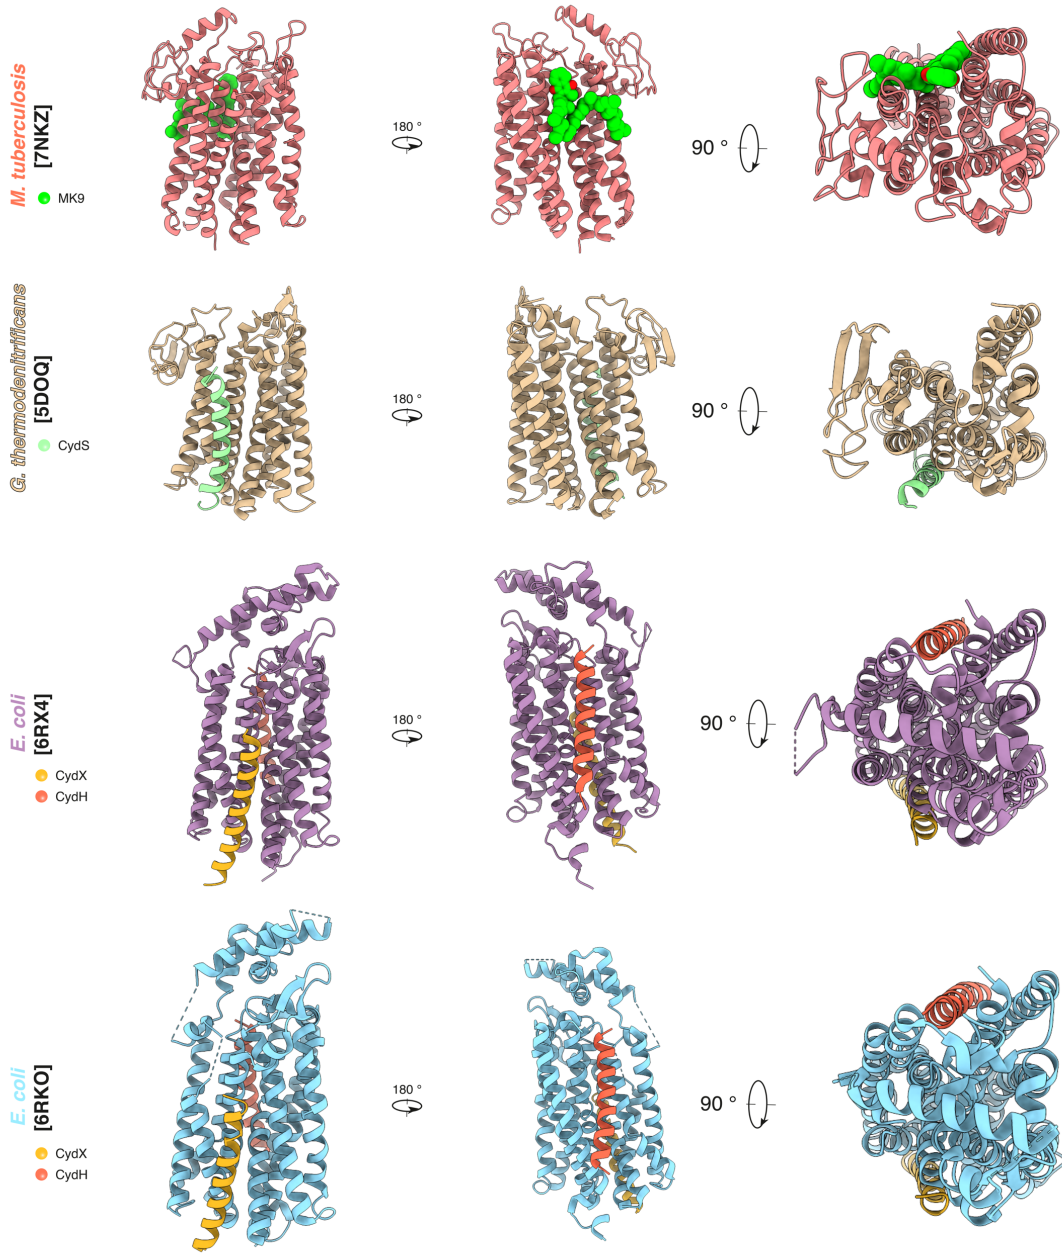

b

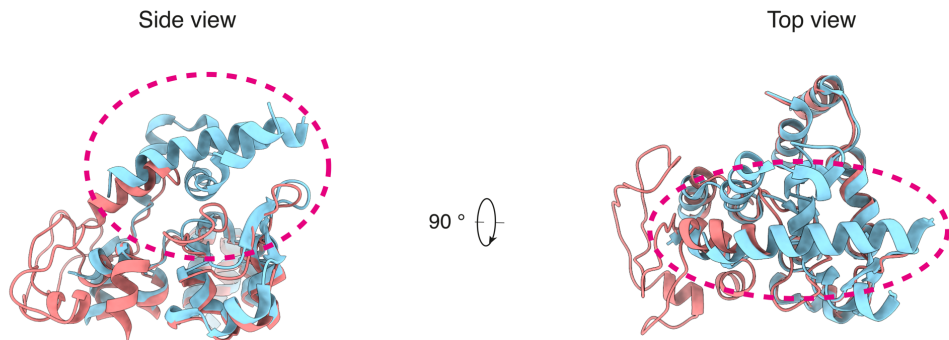



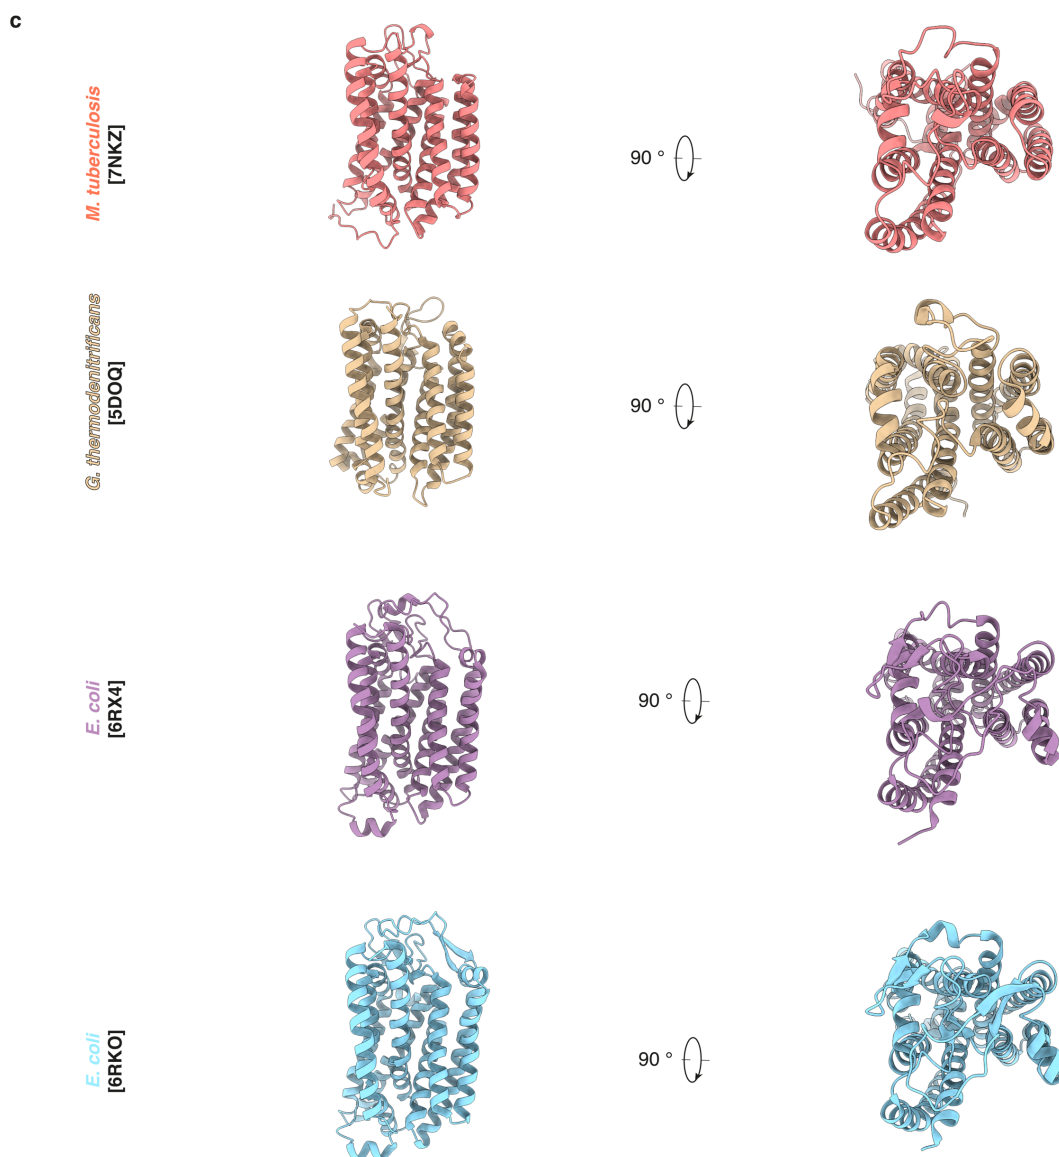

**d**

|                      | 6RKO – CydA ( <i>E. coli</i> ) |         | 6RX4 – CydA ( <i>E. coli</i> ) |         | 5DOQ – CydA ( <i>G. th</i> ) |         |
|----------------------|--------------------------------|---------|--------------------------------|---------|------------------------------|---------|
|                      | R.M.S.D                        | Z-score | R.M.S.D                        | Z-score | R.M.S.D                      | Z-score |
| CydA ( <i>M.tb</i> ) | 1.6                            | 45.2    | 1.7                            | 47.4    | 2.4                          | 42.1    |
|                      | 6RKO – CydB ( <i>E. coli</i> ) |         | 6RX4 – CydB ( <i>E. coli</i> ) |         | 5DOQ – CydB ( <i>G. th</i> ) |         |
|                      | CydB ( <i>M.tb</i> )           | 1.8     | 41.8                           | 1.8     | 42                           | 2.7     |

55

56 **Supplementary Fig. 4 – Fold analysis and structural alignments**

57 (a, c) Folds of CydA and CydB subunits from proteobacterial, actinobacterial and firmicute cytochrome  
 58 *bd* oxidase structures shown as ribbon models. Unique structural components such as accessory single-  
 59 transmembrane helix subunits or bound quinones are shown: MK9 = green, CydS = pale green, CydX =  
 60 yellow, CydH = red. (b) Structural alignment of Q-loop domains from *E. coli* and *M. tuberculosis*. The  
 61 highlighted region (dotted purple circles) indicates the location and topology of the respective Q<sub>c</sub>-  
 62 loops. (d) Root mean square deviations (R.M.S.D) of C $\alpha$  positions and corresponding Z-scores obtained  
 63 from alignments of *bd* oxidase structures.

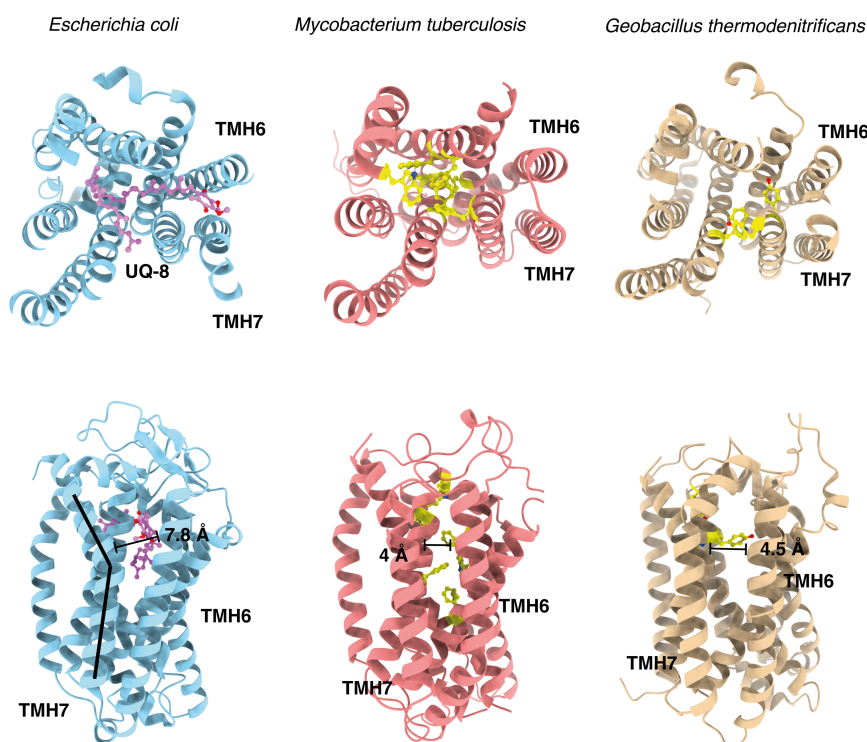

64  
 65 **Supplementary Fig. 5 – Architecture of CydB subunits.** Ribbon representation of CydB subunits from  
 66 *E. coli* (blue), *M. tuberculosis* (red), and *G. thermodenitrificans* (beige) in top view (upper panel) and  
 67 side view (lower panel) orientations. Aromatic residues positioned within the CydB specific large  
 68 membrane cavity are shown as yellow stick-and-ball models. The *E. coli* specific UQ-8 molecule that  
 69 occupies the membrane cavity of CydB is shown as a purple ball-and-stick model. Distances between  
 70 TMH6 and TMH7 are indicated. The large distances between these two helices is bridged by the UQ-8  
 71 head group in the *E. coli* enzyme. This inter-helix distance is significantly shorter in the *bd* oxidase  
 72 structures of *M. tuberculosis* and *G. thermodenitrificans*. The mycobacterial enzyme shows a larger  
 73 number of stabilizing van-der-Waals interactions within the membrane cavity than the enzyme from  
 74 *G. thermodenitrificans*.

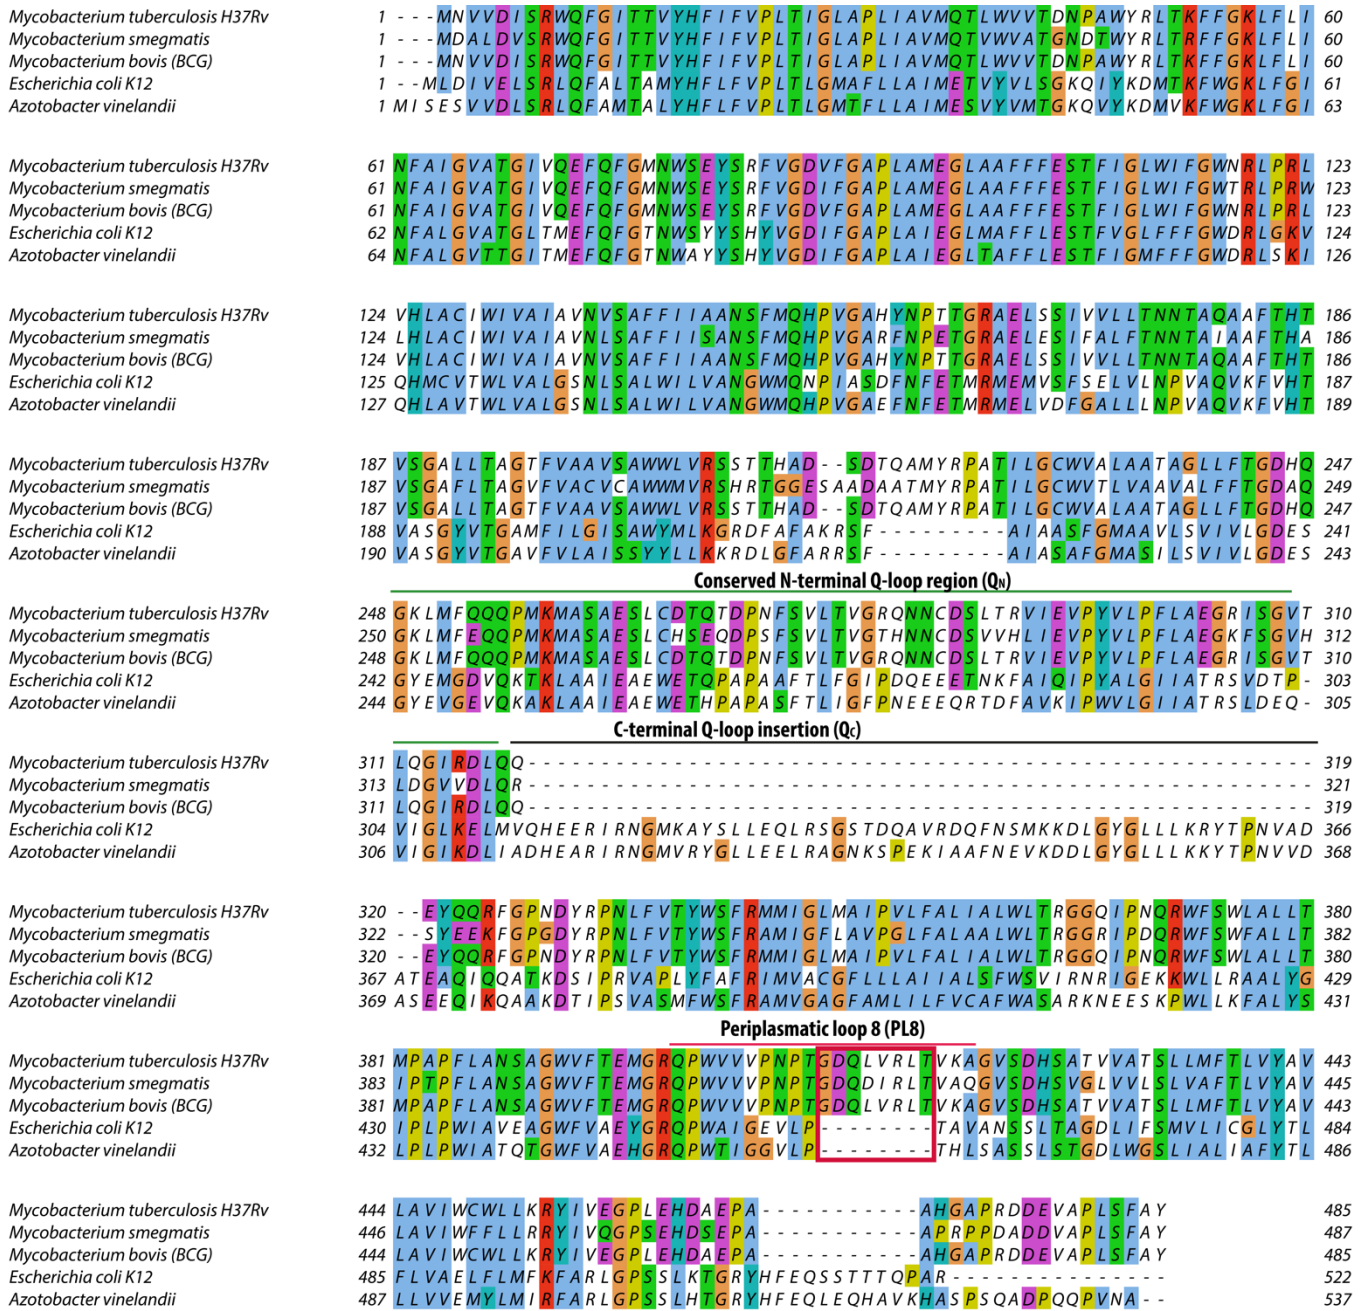

75

76 **Supplementary Fig. 6 – Sequence alignment of selected CydA subunits.** Sequence alignments of  
77 selected CydA homologs from mycobacterial cytochrome *bd* oxidase and proteobacterial enzymes  
78 containing a long Q-loop variant. Q<sub>N</sub> and Q<sub>C</sub> regions are indicated by green and black bars, respectively.  
79 The periplasmic loop 8 (PL8) which shows an interaction with the Q<sub>C</sub> domain of cyt. *bd*<sub>M.tb</sub> is indicated  
80 by a red bar. The mycobacterium specific C-terminal PL8 insertion is highlighted by a red box. Sequence  
81 alignments were generated using Clustal Omega<sup>1</sup>.

82

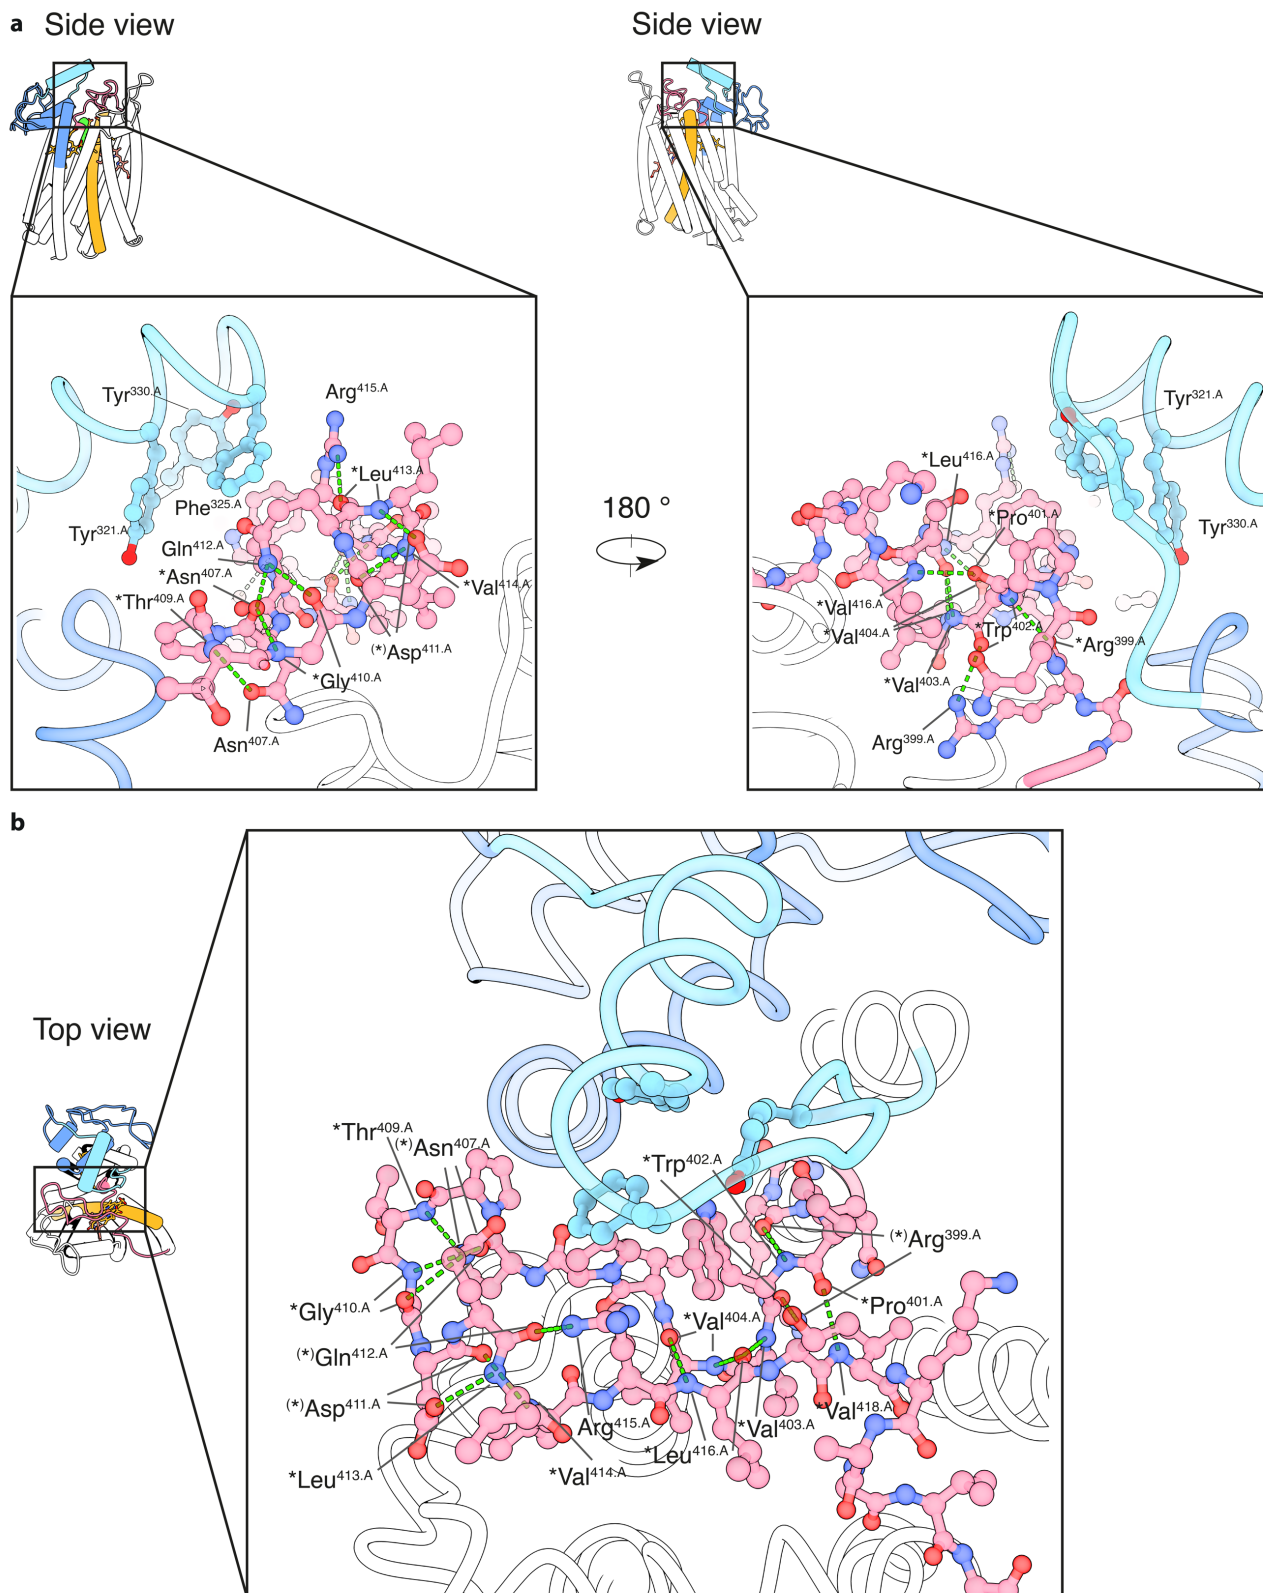

83  
 84 **Supplementary Fig. 7 – Stabilizing hydrogen bond network of PL8.** (a) Side view and (b) top view  
 85 orientations of periplasmic loop 8 of CydA. Residues of PL8 are presented as pink ball-and-stick models.  
 86 Hydrogen bonds are indicated with dashed green lines. Amino acid residue participating in the PL8  
 87 hydrogen bond network are indicated. Asterisks refer to backbone oxygens and amides as H-bond  
 88 donors and acceptors. Brackets indicate participation of backbone and sidechain atoms in H-bond  
 89 formation.

90

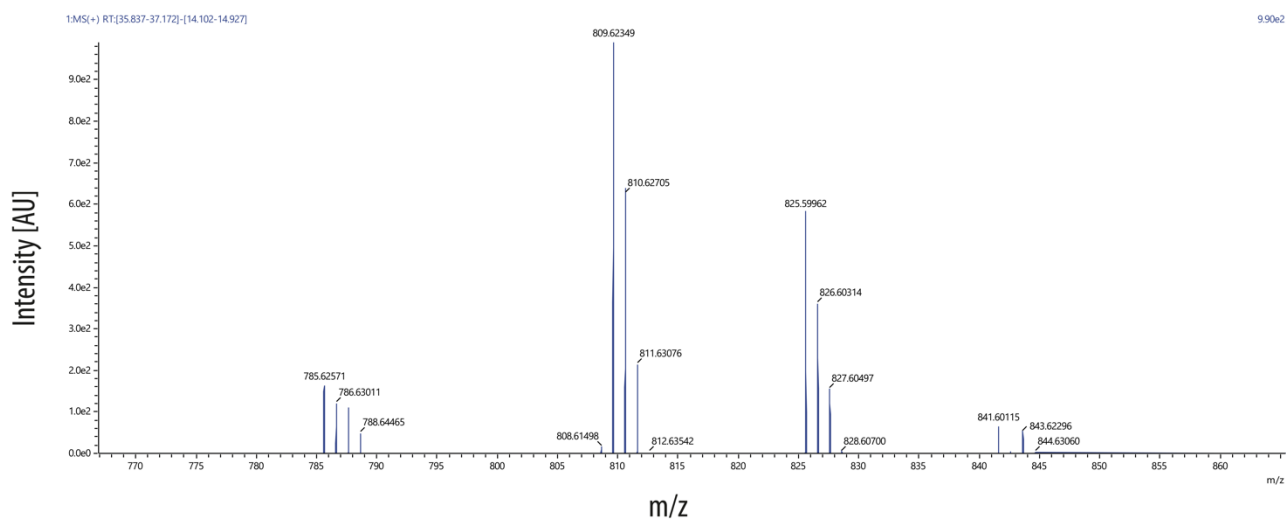

91  
92  
93  
94  
95  
96  
97

**Supplementary Fig. 8 – LC-MS spectrum of identified MK9 species in the cytochrome *bd* oxidase.**

Peaks at m/z 785.6, 809.6, and 825.6 display H<sup>+</sup>, Na<sup>+</sup> and K<sup>+</sup> adducts of oxidized MK9, respectively.

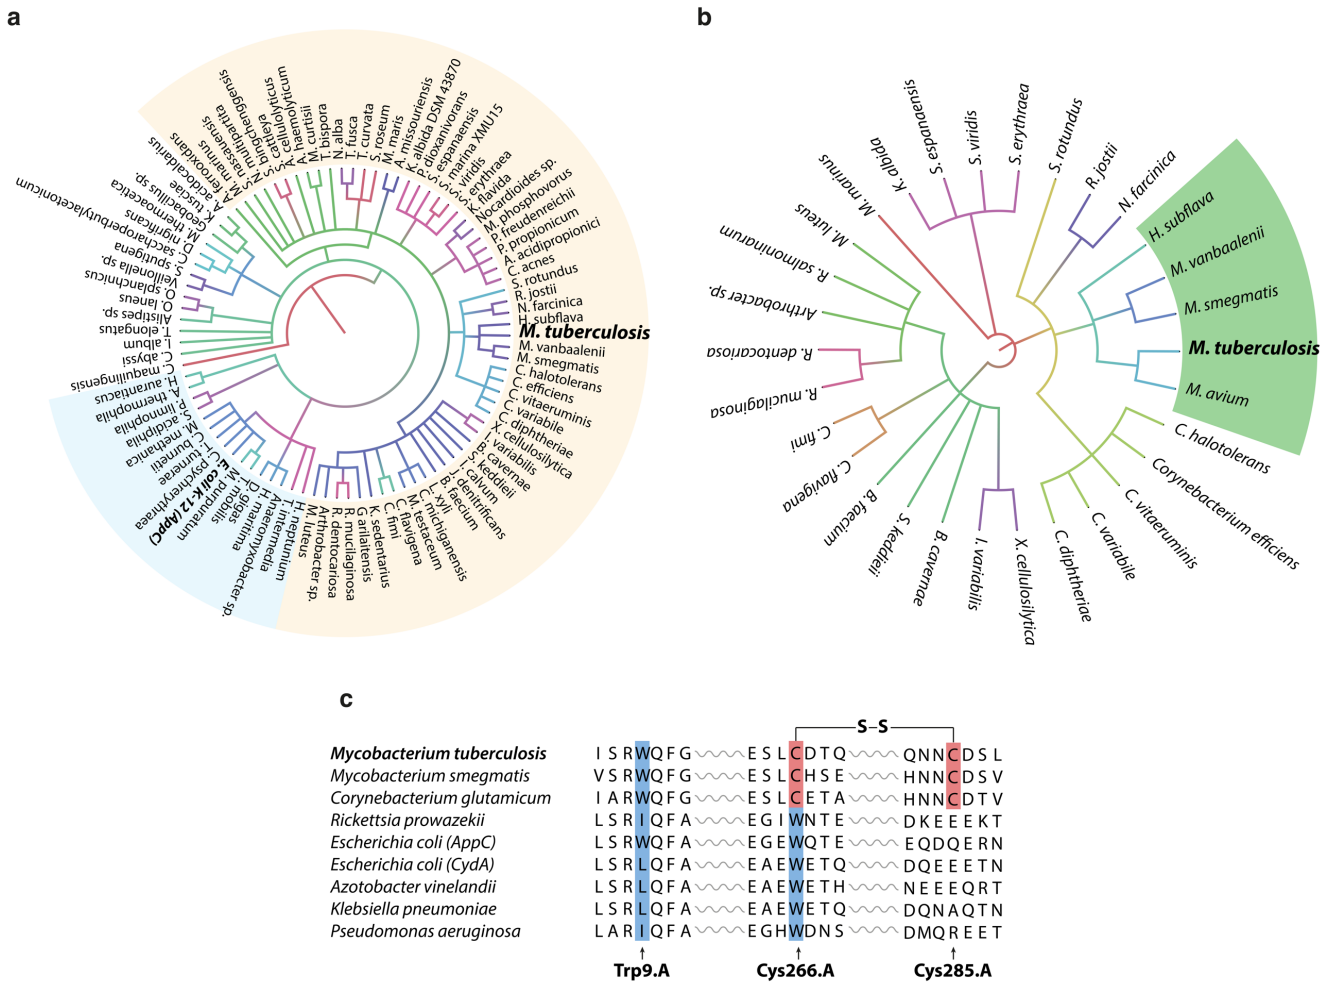

100 **Supplementary Fig. 9 – Phylogenetic distribution of structural features involved in allosteric and thiol**  
 101 **modulation of cytochrome *bd* oxidase activity.**

102 Multiple sequence alignments were carried out using 561 *CydA* sequences from the manually curated  
 103 representative genome list (Seed) of the protein family database (Pfam). (a) Phylogenetic distribution  
 104 of Trp<sup>9.A</sup> residue among bacterial and archaeal representative genomes. The majority of these  
 105 sequences belong to the phylum of Actinobacteria (beige). Conservation of the Trp residue was also  
 106 found in Proteobacteria although with lesser representation (blue). (b) Phylogenetic distribution of the  
 107 disulfide forming Cys<sup>266.A</sup> – Cys<sup>285.A</sup> pair. Among the total number of analyzed sequences only 30  
 108 orthologs (5.7 %) exhibited this residue pair. Intriguingly, all of these sequences belong the phylum of  
 109 Actinobacteria, including mycobacteria (green), and also show the presence of the signature Trp  
 110 residue in TMH1. (c) Multiple sequence alignment of selected cytochrome *bd* oxidases. Positions of  
 111 Trp<sup>9.A</sup>, Cys<sup>266.A</sup>, and Cys<sup>285.A</sup> residues are indicated. Disulfide bond forming cysteines are highlighted in  
 112 red.

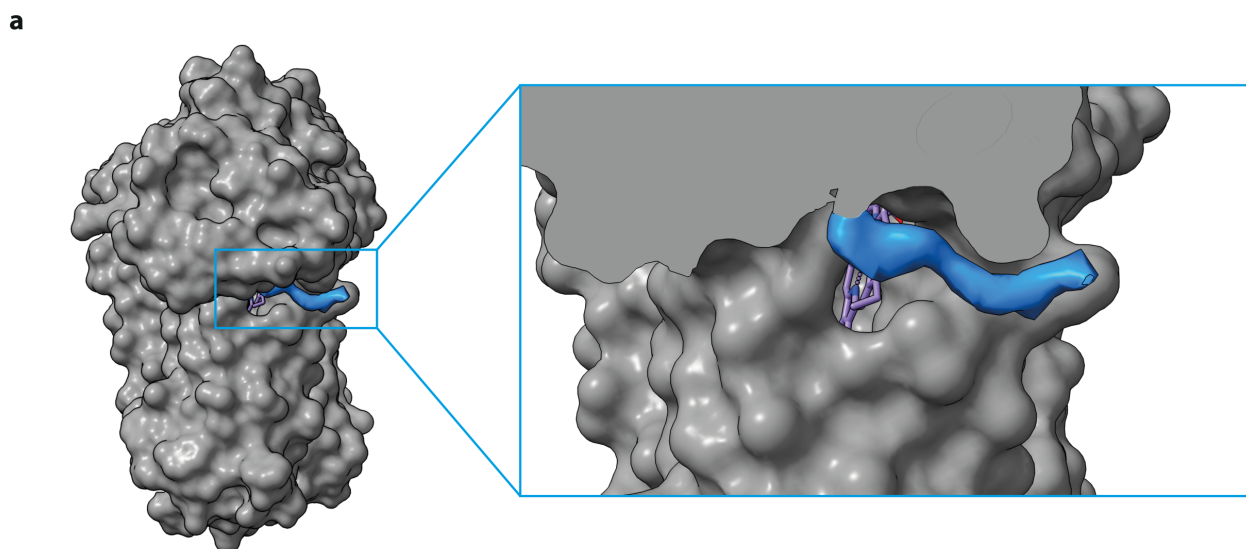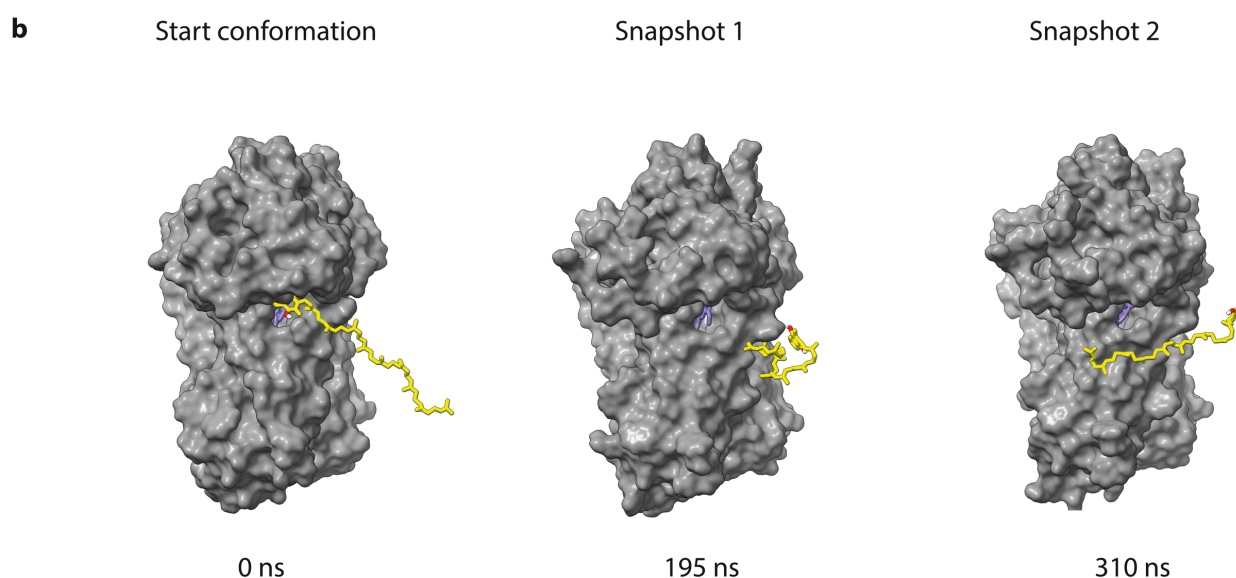

116

117 **Supplementary Fig. 10 – MD simulation of reduced MK-9 binding to the Q-loop domain. (a)**

118 Representative snapshots of a 750 ns MD simulation with reduced MK-9 docked closely to the interface

119 between the  $Q_N$  region and heme  $b_{595}$ . The head group was placed within an observable density feature

120 at this location. **(b)** The simulation snapshots visualized here demonstrate that reduced MK-9 does not

121 form a stable interaction in the region around the b-type heme with the Q-loop domain. The quinol

122 molecule diffuses into the lipid bilayer during the time frame of our simulation. CydA is shown as a

123 grey surface mode Reduced MK-9 is shown as a yellow stick model. Heme  $b_{558}$  is shown as a magenta

124 stick model.

125

126 **Supplementary References**

- 127 1. F. Sievers *et al.*, Fast, scalable generation of high-quality protein multiple sequence alignments using Clustal  
128 Omega. *Molecular Systems Biology*. **7**, 539–539 (2011).

129
